# Supplementary material
Source: MDPI journal article supplement (https://www.mdpi.com/2411-5142/9/1/46)
Supplement: s1 [file s1]

## GRRAS checklist for reporting of studies of reliability and agreement

Version based on Table I in: Kottner, J.; Audigé, L.; Brorson, S.; Donner, A.; Gajewski, B.J.; Hróbjartsson, A.; Robersts, C.; Shoukri, M.; Streiner, D.L. Guidelines for reporting reliability and agreement studies (GRRAS) were proposed. *J. Clin. Epidemiol.* **2011**, *64*, 96–106.

| Section            | Item # | Checklist Item                                                                                                                              | Reported on Page #                                                    |
|--------------------|--------|---------------------------------------------------------------------------------------------------------------------------------------------|-----------------------------------------------------------------------|
| Title/Abstract     | 1      | Identify in title or abstract that interrater/intrarater reliability or agreement was investigated.                                         | #Page 1, Line 2.                                                      |
| Introduction       | 2      | Name and describe the diagnostic or measurement device of interest explicitly.                                                              | #Page 2, Line 60-74                                                   |
|                    | 3      | Specify the subject population of interest.                                                                                                 | #Page 2, Line 76-77                                                   |
|                    | 4      | Specify the rater population of interest (if applicable).                                                                                   | N/A                                                                   |
|                    | 5      | Describe what is already known about reliability and agreement and provide a rationale for the study (if applicable).                       | #Page 2, Line 66-74                                                   |
| Methods            | 6      | Explain how the sample size was chosen. State the determined number of raters, subjects/objects, and replicate observations.                | #Page 3, Line 84-96<br>#Page 4, Line 147-148                          |
|                    | 7      | Describe the sampling method.                                                                                                               | #Page 3, Line 85-87                                                   |
|                    | 8      | Describe the measurement/rating process (e.g. time interval between repeated measurements, availability of clinical information, blinding). | #Page 3, Line 109 - #Page 4, Line 128-158                             |
|                    | 9      | State whether measurements/ratings were conducted independently.                                                                            | #Page 4, Line 154-158                                                 |
|                    | 10     | Describe the statistical analysis.                                                                                                          | #Page 5, Line 160-171                                                 |
| Results            | 11     | State the actual number of raters and subjects/objects which were included and the number of replicate observations which were conducted.   | #Page 5, Line 174-175                                                 |
|                    | 12     | Describe the sample characteristics of raters and subjects (e.g. training, experience).                                                     | Subjects: #Page 5, Line 174-187<br><br>Raters: #Page 4, Line 158-160. |
|                    | 13     | Report estimates of reliability and agreement including measures of statistical uncertainty.                                                | #Page 6, Table 1.<br>#Page 7, Figure 3<br>#Page 8, Figure 4           |
| Discussion         | 14     | Discuss the practical relevance of results.                                                                                                 | #Page 8, Line 236-248                                                 |
| Auxiliary material | 15     | Provide detailed results if possible (e.g. online).                                                                                         |                                                                       |
